# Supplementary material for: Is India ready for mental health apps (MHApps)? A quantitative-qualitative exploration of caregivers’ perspective on smartphone-based solutions for managing severe mental illnesses in low resource settings
Source: PubMed Central journal article supplement (PMC6145572; doi:10.1371/journal.pone.0203353), 2018-09-19
Supplement: pone.0203353.s002.pdf [file pone.0203353.s002.pdf]

# Understanding caregiver & patient needs for mobile based intervention in severe mental illnesses in low-resource settings

## Performa for the CAREGIVER:

|                                            |                                  |                  |                |              |                                                                           |               |         |
|--------------------------------------------|----------------------------------|------------------|----------------|--------------|---------------------------------------------------------------------------|---------------|---------|
| <b>Relation to patient</b>                 | Father                           | Mother           | Son            | Daughter     | Relative (Specify)                                                        |               |         |
| <b>Age (years)</b>                         | <b>Distance from Center (km)</b> |                  |                |              |                                                                           |               |         |
| <b>Gender</b>                              | Male                             | Female           | Other          |              |                                                                           |               |         |
| <b>Marital Status</b>                      | Never Married                    | Married          | Separated      | Divorced     | Widowed                                                                   | Other:        |         |
| <b>Education</b>                           | Illiterate                       | Literate         | Primary        | Middle       | Graduate                                                                  | Post-Graduate |         |
|                                            | Other:                           |                  |                |              | Total years of education                                                  |               |         |
| <b>Occupation</b>                          | Unemployed                       | Unskilled worker | Skilled Worker | Professional | Housewife                                                                 | Retired       | Student |
|                                            | Business                         | Farmer           | Other:         |              |                                                                           |               |         |
| <b>Current Employment</b>                  | Yes                              | No               | Partly         |              | Specify employment status in last 30 days                                 |               |         |
| <b>Monthly Income</b>                      |                                  |                  |                |              | Specify total family income in INR                                        |               |         |
| <b>Religion</b>                            | Hindu                            | Islam            | Christianity   | Sikhism      | Other:                                                                    |               |         |
| <b>Time spent in caregiving</b>            |                                  |                  |                |              | Specify, time in hours/day, that are needed for caregiving of the patient |               |         |
| <b>Common activities requiring support</b> | 1)                               |                  |                |              |                                                                           |               |         |
|                                            | 2)                               |                  |                |              |                                                                           |               |         |
|                                            | 3)                               |                  |                |              |                                                                           |               |         |

## Performa for the PATIENT/WARD of the caregiver:

|                                  |               |                  |                                  |              |                                           |                                                                      |         |
|----------------------------------|---------------|------------------|----------------------------------|--------------|-------------------------------------------|----------------------------------------------------------------------|---------|
| <b>ICD Diagnosis</b>             |               |                  |                                  |              |                                           | As per file                                                          |         |
| <b>Age</b>                       |               |                  |                                  |              |                                           | In years                                                             |         |
| <b>Gender</b>                    | Male          | Female           | Other                            |              |                                           |                                                                      |         |
| <b>Marital Status</b>            | Never Married | Married          | Separated                        | Divorced     | Widowed                                   | Other:                                                               |         |
| <b>Education</b>                 | Illiterate    | Literate         | Primary                          | Middle       | Graduate                                  | Post-Graduate                                                        |         |
|                                  | Other:        |                  |                                  |              | Total years of education                  |                                                                      |         |
| <b>Occupation</b>                | Unemployed    | Unskilled worker | Skilled Worker                   | Professional | Housewife                                 | Retired                                                              | Student |
|                                  | Business      | Farmer           | Other:                           |              |                                           |                                                                      |         |
| <b>Current Employment</b>        | Yes           | No               | Partly                           |              | Specify employment status in last 30 days |                                                                      |         |
| <b>Age of onset of illness</b>   |               |                  | <b>Total Duration of Illness</b> |              |                                           |                                                                      |         |
| <b>Course of illness</b>         |               |                  | <b>Time in treatment</b>         |              |                                           |                                                                      |         |
| <b>Principal Treatment</b>       | Antipsychotic |                  | Antidepressants                  |              | Mood Stabilizers                          |                                                                      |         |
| <b>Principal Medication Name</b> |               |                  |                                  |              |                                           |                                                                      |         |
| <b>Family History</b>            |               |                  |                                  |              |                                           | Specify history of psychiatric disorders in 1 <sup>o</sup> relatives |         |

# Understanding caregiver & patient needs for mobile based intervention in severe mental illnesses in low-resource settings

## Mobile Phone and Internet Use Habits & Needs Questionnaire

| <b>Part A: Mobile Phone Use</b>                                                                                                  |                |                                                                |                        |                   |                  |
|----------------------------------------------------------------------------------------------------------------------------------|----------------|----------------------------------------------------------------|------------------------|-------------------|------------------|
| Do you currently own a mobile phone?                                                                                             | Yes            | No                                                             | <b>Phone Model No:</b> |                   |                  |
| What type of mobile phone is it?                                                                                                 | Simple Phone   | Smart Phone                                                    |                        |                   |                  |
| What platform does your phone operate on                                                                                         | Android        | iOS                                                            | Windows                | Other:            |                  |
| What sensors do your phone have                                                                                                  | Camera         | GPS                                                            | Accelerometer          | HR Sensor         | Other:           |
| What do you generally do with your phone                                                                                         | Call           | SMS                                                            | Internet               | email             | Shop             |
|                                                                                                                                  | WhatsApp       | Facebook                                                       | Games                  | Alarm             | Calendar         |
| <i>Do your <b>patient</b> own a mobile phone?</i>                                                                                | Yes            | No                                                             | <b>Phone Model No:</b> |                   |                  |
| <i>What type of mobile phone is it?</i>                                                                                          | Simple Phone   | Smart Phone                                                    |                        |                   |                  |
| <i>What platform does his phone operate on</i>                                                                                   | Android        | iOS                                                            | Windows                | Nokia             | Samsung          |
| <i>What sensors do the phone have</i>                                                                                            | Camera         | GPS                                                            | Accelerometer          | HR Sensor         | Other:           |
| <i>What does your ward generally do with the phone</i>                                                                           | Call           | SMS                                                            | Internet               | email             | Shop             |
|                                                                                                                                  | WhatsApp       | Facebook                                                       | Games                  | Alarm             | Calendar         |
| <b>Part B: Internet related Behavior</b>                                                                                         |                |                                                                |                        |                   |                  |
| Do you have access to internet                                                                                                   | No             | Yes                                                            | Landline               | Mobile            |                  |
| Can your phone download applications or “apps”?                                                                                  | No             | Yes                                                            | How many apps on phone |                   |                  |
| How many “apps” do you put on your phone each month?                                                                             |                | How many health care-related “apps” do you have on your phone? |                        |                   |                  |
| <b>In the past 6 months, have you used your smartphone</b><br>- to access general health care information?                       | Yes (for self) |                                                                | No (for self)          | Yes (for patient) | No (for patient) |
| - to access your personal health care information such as, test results or to schedule appointments?                             | Yes (for self) |                                                                | No (for self)          | Yes (for patient) | No (for patient) |
| Would you want to be able to access general information related to your patient’s illness via your smartphone?                   |                |                                                                |                        | Yes               | No               |
| Would you want to receive text messages related to your patient’s health from your doctor’s office?                              |                |                                                                |                        | Yes               | No               |
| Would you want to use your phone to help track your patient’s medical condition via an “app” on your smartphone?                 |                |                                                                |                        | Yes               | No               |
| Would you download an “app” to your phone to help monitor your patient’s health condition?                                       |                |                                                                |                        | Yes               | No               |
| Would you be willing to use an application or “app” on your phone on a <b>daily</b> basis to help monitor your health condition? |                |                                                                |                        | Yes               | No               |
| Do you think such “app” will be helpful in the various caregiving activities that you do?                                        |                |                                                                |                        | Yes               | No               |
| Do you think such “apps” will add to the burden of caregiving?                                                                   |                |                                                                |                        | Yes               | No               |
| What caregiving activity can be helped <b>most</b> by using mobile phones and internet? (Give a single activity)                 |                |                                                                |                        |                   |                  |
|                                                                                                                                  |                |                                                                |                        |                   |                  |

---END---
