# Supplementary material for: Is India ready for mental health apps (MHApps)? A quantitative-qualitative exploration of caregivers’ perspective on smartphone-based solutions for managing severe mental illnesses in low resource settings
Source: PLoS One. 2018 Sep 19;13(9):e0203353. doi: 10.1371/journal.pone.0203353 (PMC6145572; doi:10.1371/journal.pone.0203353)
Supplement: S1 File — This file includes Hindi version of the survey used for the study. (PDF) [file pone.0203353.s001.pdf]

# कम - संसाधन वाले देशों में, गंभीर मानसिक बीमारियों से पीड़ित मरीजों और उनके परिवार में, मोबाइल-आधारित हस्तक्षेप की ज़रूरतों को समझना

## देखभालकर्ताओं की जानकारी:

|                                                           |                           |                |                 |                     |                                                             |                                      |       |
|-----------------------------------------------------------|---------------------------|----------------|-----------------|---------------------|-------------------------------------------------------------|--------------------------------------|-------|
| मरीज़ से सम्बन्ध:                                         | पिता                      | माँ            | बेटा            | बेटी                | रिश्तेदार (स्पष्ट करें)                                     |                                      |       |
| उम्र (साल में)                                            | केंद्र से दूरी (किलोमीटर) |                |                 |                     |                                                             |                                      |       |
| लिंग                                                      | पुरुष                     | महिला          | अन्य            |                     |                                                             |                                      |       |
| वैवाहिक स्थिति                                            | अविवाहित                  | विवाहित        | अलग रहते हैं    | तलाक़्शुदा          | विधवा / विधुर                                               | अन्य                                 |       |
| शिक्षा                                                    | अनपढ़                     | पढ़े - लिखे    | प्राथमिक शिक्षा | मध्य - शिक्षा       | स्नातक                                                      | स्नातकोत्तर                          |       |
|                                                           | अन्य :                    |                |                 | शिक्षा के कुल वर्ष: |                                                             |                                      |       |
| व्यवसाय                                                   | बेरोज़गार                 | अकुशल कर्मचारी | कुशल कर्मचारी   | पेशेवर              | गृहणी                                                       | सेवानिवृत्त                          | छात्र |
|                                                           | व्यवसाय                   | किसान          | अन्य :          |                     |                                                             |                                      |       |
| वर्तमान में रोज़गार की स्थिति                             | हाँ                       | नहीं           | आंशिक रूप से    |                     |                                                             | पिछले ३० दिनों में रोज़गार की स्थिति |       |
| मानसिक आमदनी                                              |                           |                |                 |                     | कुल पारिवारिक आय स्पष्ट करें                                |                                      |       |
| धर्म                                                      | हिन्दू                    | मुस्लिम        | ईसाई            | सिख                 | अन्य                                                        |                                      |       |
| देखभाल में व्यतीत समय                                     |                           |                |                 |                     | घंटे/दिन में बताएं की मरीज़ की देखभाल में कितना समय लगता है |                                      |       |
| सारी सामान्य गतिविधियां जिसमें मरीज़ को मदद देनी पड़ती है | 1)                        |                |                 |                     |                                                             |                                      |       |
|                                                           | 2)                        |                |                 |                     |                                                             |                                      |       |
|                                                           | 3)                        |                |                 |                     |                                                             |                                      |       |

## मरीज़ की जानकारी:

|                                     |               |                |                    |                          |                                                             |             |       |
|-------------------------------------|---------------|----------------|--------------------|--------------------------|-------------------------------------------------------------|-------------|-------|
| आई सी डी निदान                      |               |                |                    |                          | फाइल के मुताबिक:                                            |             |       |
| उम्र (साल में)                      |               |                |                    |                          |                                                             |             |       |
| लिंग                                | पुरुष         | महिला          | अन्य               |                          |                                                             |             |       |
| वैवाहिक स्थिति                      | अविवाहित      | विवाहित        | अलग रहते हैं       | तलाक़्शुदा               | विधवा / विधुर                                               | अन्य        |       |
| शिक्षा                              | अनपढ़         | पढ़े - लिखे    | प्राथमिक शिक्षा    | मध्य - शिक्षा            | स्नातक                                                      | स्नातकोत्तर |       |
|                                     | अन्य :        |                |                    | Total years of education |                                                             |             |       |
| व्यवसाय                             | बेरोज़गार     | अकुशल कर्मचारी | कुशल कर्मचारी      | पेशेवर                   | गृहणी                                                       | सेवानिवृत्त | छात्र |
|                                     | व्यवसाय       | किसान          | अन्य               |                          |                                                             |             |       |
| वर्तमान में रोज़गार की स्थिति       | हाँ           | नहीं           | आंशिक रूप से       |                          | पिछले ३० दिनों में रोज़गार की स्थिति                        |             |       |
| बीमारी शुरू होने की उम्र            |               |                | बीमारी की कुल अवधि |                          |                                                             |             |       |
| बीमारी का कोर्स                     |               |                | इलाज की कुल अवधि   |                          |                                                             |             |       |
| प्रधान उपचार                        | एंटी सायकोटिक |                | एंटी डेप्रेसेंट    |                          | मूड स्टेबलाइजर                                              |             |       |
| प्रधान दवाई का नाम                  |               |                |                    |                          |                                                             |             |       |
| परिवार में मानसिक बिमारी की जानकारी |               |                |                    |                          | परिवार में किसी को मानसिक बिमारी है, तो उसके बारे में बताये |             |       |

# कम - संसाधन वाले देशों में, गंभीर मानसिक बीमारियों से पीड़ित मरीजों और उनके परिवार में, मोबाइल-आधारित हस्तक्षेप की ज़रूरतों को समझना

## मोबाइल फ़ोन और इंटरनेट की आदतें और ज़रूरतों से सम्बंधित जानकारी

|                                                                                                                            |                  |                   |                                                  |                     |         |  |
|----------------------------------------------------------------------------------------------------------------------------|------------------|-------------------|--------------------------------------------------|---------------------|---------|--|
| <b>भाग ए : मोबाइल फ़ोन का इस्तेमाल</b>                                                                                     |                  |                   |                                                  |                     |         |  |
| क्या आपके पास वर्तमान में मोबाइल फ़ोन है?                                                                                  | हाँ              | नहीं              | <b>फ़ोन मोडल नंबर:</b>                           |                     |         |  |
| वह किस तरह का मोबाइल फ़ोन है?                                                                                              | साधारण फ़ोन      | स्मार्ट फ़ोन      |                                                  |                     |         |  |
| आपका फ़ोन किस प्लेटफ़ॉर्म का उपयोग करता है?                                                                                | एंड्रॉइड         | आई ओ एस           | विंडोज                                           | अन्य                |         |  |
| आपके फ़ोन में कौन-कौन से सेंसर हैं?                                                                                        | कैमरा            | जी पी एस          | एक्सेलेरोमीटर                                    | एच आर सेंसर         | अन्य    |  |
| ज़्यादातर आप अपने फ़ोन का इस्तेमाल किन चीज़ों के लिए करते हैं?                                                             | बातचीत           | एस एम एस          | इंटरनेट                                          | ईमेल                | खरीदारी |  |
|                                                                                                                            | व्हाट्सएप        | फेसबुक            | खेल                                              | अलार्म              | कैलेंडर |  |
| क्या आपके मरीज़ के पास मोबाइल फ़ोन है?                                                                                     | हाँ              | नहीं              | <b>फ़ोन मोडल नंबर:</b>                           |                     |         |  |
| वह किस तरह का मोबाइल फ़ोन है?                                                                                              | साधारण फ़ोन      | स्मार्ट फ़ोन      |                                                  |                     |         |  |
| उनका फ़ोन किस प्लेटफ़ॉर्म का उपयोग करता है?                                                                                | एंड्रॉइड         | आई ओ एस           | विंडोज                                           | अन्य                |         |  |
| उनके फ़ोन में कौन-कौन से सेंसर हैं?                                                                                        | कैमरा            | जी पी एस          | एक्सेलेरोमीटर                                    | एच आर सेंसर         | अन्य    |  |
| ज़्यादातर आपका मरीज़ अपने फ़ोन का इस्तेमाल किन चीज़ों के लिए करता है?                                                      | बातचीत           | एस एम एस          | इंटरनेट                                          | ईमेल                | खरीदारी |  |
|                                                                                                                            | व्हाट्सएप        | फेसबुक            | खेल                                              | अलार्म              | कैलेंडर |  |
| <b>भाग बी: इंटरनेट-सम्बन्धी व्यवहार</b>                                                                                    |                  |                   |                                                  |                     |         |  |
| क्या आपके पास इंटरनेट का साधन है?                                                                                          | नहीं             | हाँ               | लैंडलाइन                                         | मोबाइल              |         |  |
| क्या आपके फ़ोन में "एप्स" / आप्लिकेशन्स डाउनलोड हो सकती हैं?                                                               | नहीं             | हाँ               | आपके फ़ोन में कितनी एप्स हैं?                    |                     |         |  |
| आप हर महीने अपने फ़ोन में कितनी एप्स डालते हैं?                                                                            |                  |                   | आपके फ़ोन में स्वास्थ्य-सम्बन्धी कितनी एप्स हैं? |                     |         |  |
| पिछले ६ महीनों में क्या आपने अपना स्मार्ट फ़ोन इन गतिविधियों के लिए इस्तेमाल किया है?                                      | हाँ (खुद के लिए) | नहीं (खुद के लिए) | हाँ (मरीज़ के लिए)                               | नहीं (मरीज़ के लिए) |         |  |
| - सामान्य स्वास्थ्य-सम्बन्धी जानकारी लेने के लिए?                                                                          | हाँ (खुद के लिए) | नहीं (खुद के लिए) | हाँ (मरीज़ के लिए)                               | नहीं (मरीज़ के लिए) |         |  |
| - अपनी व्यक्तिगत स्वास्थ्य देखभाल जानकारी जैसे परीक्षण परिणामों या नियुक्तियों को निर्धारित करने के लिए                    | हाँ (खुद के लिए) | नहीं (खुद के लिए) | हाँ (मरीज़ के लिए)                               | नहीं (मरीज़ के लिए) |         |  |
| - क्या आप अपने स्मार्टफोन के माध्यम से अपने रोगी की बीमारी से संबंधित सामान्य जानकारी तक पहुंचने में सक्षम होना चाहते हैं? | हाँ              |                   |                                                  | नहीं                |         |  |
| -क्या आप अपने डॉक्टर से अपने मरीज़ के स्वास्थ्य से संबंधित टेक्स्ट संदेश प्राप्त करना चाहते हैं?                           | हाँ              |                   |                                                  | नहीं                |         |  |
| -क्या आप अपने स्मार्टफोन पर "ऐप" के माध्यम से अपने रोगी की चिकित्सा-सम्बंधित स्थिति को ट्रैक करने में मदद चाहते हैं?       | हाँ              |                   |                                                  | नहीं                |         |  |
| -क्या आप अपने मरीज़ की स्वास्थ्य स्थिति की निगरानी में मदद के लिए अपने फोन पर "ऐप" डाउनलोड करेंगे?                         | हाँ              |                   |                                                  | नहीं                |         |  |
| -क्या आप, रोज़मर्रा में, ऐप के जरिये अपने स्वास्थ्य की निगरानी रखना चाहेंगे?                                               | हाँ              |                   |                                                  | नहीं                |         |  |
| -क्या आप सोचते हैं की इस तरह के ऐप से आपको अपने रोगी की देखभाल करने में मदद करेगी?                                         | हाँ              |                   |                                                  | नहीं                |         |  |
| -क्या आप सोचते हैं की इस तरह की ऐप रोगी की देखभाल के बोझ को और भड़ा देगी?                                                  | हाँ              |                   |                                                  | नहीं                |         |  |

-मोबाइल फ़ोन और इंटरनेट का इस्तेमाल करके किस तरह की देखभाल-सम्बन्धी गतिविधि में मदद मिलेगी? (एक गतिविधि बताएं)

---खत्म---
